# Supplementary material for: A critical view at the ISO 13528 and IUPAC's harmonized protocol approach for proficiency testing for homogeneity assessment for quantitative variables
Source: Royal Society of Chemistry journal article supplement (doi:10.1039/d0an01607a), 2020-01-01
Supplement: d0an01607a1.pdf [file d0an01607a1.pdf]

## Supplementary data

### Example of simulated data

A data series is generated using a repeatability of 0.5, batch standard deviation of 0.3 using 10 samples, analysed in duplicate. The EQA standard deviation is expected to be 1. Since the batch standard deviation and the EQA standard deviation are expressed in the same units, no units need to be mentioned. Moreover, the mean can be freely chosen, so it is decided to use a mean of 10. In a first instance, the mean value of the 10 samples is generated by drawing 10 random values from a normal distribution with mean 10 and standard deviation 0.3:

| Sample 1 | Sample 2 | Sample 3 | Sample 4 | Sample 5 | Sample 6 | Sample 7 | Sample 8 | Sample 9 | Sample 10 |
|----------|----------|----------|----------|----------|----------|----------|----------|----------|-----------|
| 9.726    | 10.466   | 9.979    | 9.872    | 10.134   | 9.697    | 10.665   | 10.298   | 10.129   | 9.790     |

In a second instance, two values are drawn from a normal distribution with mean the mean of each sample and standard deviation 0.5:

| Sample 1 | Sample 2 | Sample 3 | Sample 4 | Sample 5 | Sample 6 | Sample 7 | Sample 8 | Sample 9 | Sample 10 |
|----------|----------|----------|----------|----------|----------|----------|----------|----------|-----------|
| 9.483    | 11.426   | 9.707    | 9.460    | 10.211   | 9.580    | 10.660   | 9.920    | 10.194   | 10.614    |
| 9.902    | 9.645    | 10.599   | 10.099   | 9.451    | 10.133   | 10.571   | 9.906    | 8.774    | 10.170    |

The  $MS_{\text{between}}$  from the Anova-model is 0.2894, the  $MS_{\text{within}}$  is 0.3828. The difference between the two is smaller than 0, so these data force to conclude that the batch standard deviation is 0.
